1 **Transient topographical dynamics of the electroencephalogram predict**  
2 **brain connectivity and behavioural responsiveness during drowsiness**

3 Iulia M. Comsa<sup>1</sup>, Tristan A. Bekinschtein<sup>2</sup>, Srivas Chennu<sup>3, 1, \*</sup>

4 <sup>1</sup> Department of Clinical Neurosciences, University of Cambridge, Cambridge, United Kingdom

5 <sup>2</sup> Department of Psychology, University of Cambridge, Cambridge, United Kingdom

6 <sup>3</sup> School of Computing, University of Kent, Canterbury, United Kingdom

7 \* Correspondence: [sc672@cam.ac.uk](mailto:sc672@cam.ac.uk)

## 8 **Abstract**

9 As we fall sleep, our brain traverses a series of gradual changes at physiological, behavioural and  
10 cognitive levels, which are not yet fully understood. The loss of responsiveness is a critical event in  
11 the transition from wakefulness to sleep. Here we seek to understand the electrophysiological  
12 signatures that reflect the loss of capacity to respond to external stimuli during drowsiness using two  
13 complementary methods: spectral connectivity and EEG microstates. Furthermore, we integrate  
14 these two methods for the first time by investigating the connectivity patterns captured during  
15 individual microstate lifetimes. While participants performed an auditory semantic classification  
16 task, we allowed them to become drowsy and unresponsive. As they stopped responding to the  
17 stimuli, we report the breakdown of frontoparietal alpha networks and the emergence of  
18 frontoparietal theta connectivity. Further, we show that the temporal dynamics of all canonical EEG  
19 microstates slow down during unresponsiveness. We identify a specific microstate (D) whose  
20 occurrence and duration are prominently increased during this period. Employing machine learning,  
21 we show that the temporal properties of microstate D, particularly its prolonged duration, predicts  
22 the response likelihood to individual stimuli. Finally, we find a novel relationship between  
23 microstates and brain networks as we show that microstate D uniquely indexes significantly stronger  
24 theta connectivity during unresponsiveness. Our findings demonstrate that the transition to  
25 unconsciousness is not linear, but rather consists of an interplay between transient brain networks  
26 reflecting different degrees of sleep depth.

27 **Keywords:** drowsiness; responsiveness; EEG microstates; brain connectivity

## 28 **Author summary**

29 How do we lose responsiveness as we fall asleep? As we become sleepy, our ability to react to  
30 external stimuli disappears gradually. Here we sought to understand the rapid fluctuations in brain  
31 electrical activity that predict the loss of responsiveness as participants fell asleep while performing  
32 a word classification task. We analysed the patterns of connectivity between anterior and posterior  
33 brain regions observed during wakefulness in alpha band and showed that this connectivity shifted  
34 to slower theta frequencies as participants became unresponsive. We also investigated the dynamics  
35 of brain electrical microstates, which represent an alphabet of quasi-stable global brain states with  
36 lifetimes of 10-100 milliseconds, and found that the temporal dynamics of microstates slowed down  
37 when participants became unresponsive. Using machine learning, we further showed that  
38 microstate dynamics prior to a stimulus predict whether subjects will respond to it. We integrated  
39 microstates and connectivity for the first time to show that a specific microstate captures  
40 connectivity patterns correlated with unresponsiveness during this transition. We conclude that  
41 falling asleep is accompanied by a millisecond-level interplay between distinct brain networks, and  
42 suggest a renewed focus on fine-grained temporal scales in the study of transitions between levels  
43 of consciousness.

## 44 Introduction

45 As we fall asleep, our brain traverses a series of changes which accompany the loss of sensory  
46 awareness and responsiveness to the external world. Despite the subjective ability to classify  
47 retrospectively one's own state as "awake" or "asleep" (Hori et al., 1994), research continues to  
48 unravel the gradual transitions happening at behavioural (Ogilvie and Wilkinson, 1984), cellular  
49 (Steriade et al., 1993), physiological (Prerau et al., 2014) and cognitive (Goupil and Bekinschtein,  
50 2012) level, starting with early drowsiness and continuing into the deep stages of sleep (Ogilvie,  
51 2001). Characterising these transitions and linking across physiological levels is an important step in  
52 the modern attempt to understand access-consciousness (Block, 1996; Koch et al., 2016) and its  
53 fluctuations in natural, pathological and pharmacological alterations: sleep (Hobson and Pace-  
54 Schott, 2002), disorders of consciousness (Giacino et al., 2014), sedation and anaesthesia (Alkire et  
55 al., 2008).

56 The transition from wakefulness to sleep involves a progressive and sometimes nonlinear loss of  
57 responsiveness to external stimuli (Ogilvie and Wilkinson, 1984). Behavioural unresponsiveness does  
58 not immediately imply unconsciousness (Overgaard and Overgaard, 2011; Sanders et al., 2013).  
59 However, from the perspective of levels of consciousness (Laureys, 2005), the capacity to respond to  
60 external stimuli offers an objective measurement in the process of transition between full  
61 wakefulness and sleep-induced unconsciousness. The question of how we stop responding to stimuli  
62 during drowsiness is related to, but distinct from an investigation of the stages of sleep  
63 conventionally defined by specific electrophysiological grapho-elements (Iber et al., 2007; Ogilvie,  
64 2001). Indeed, the loss of responsiveness is and distributed across sleep stages: one study found a  
65 rate of unresponsiveness of 28% in stage 1, 76% in stage 2, and 95% in stage 3 of sleep (Ogilvie and  
66 Wilkinson, 1984). Here, we are specifically interested in the neural markers that predict our inability  
67 to respond as we drift to sleep.

68 A traditional approach for investigating this question is to look at the changes in EEG spectral power  
69 and connectivity, which have been shown to vary across levels of consciousness. During relaxed  
70 wakefulness, the EEG of most human subjects is characterised by trains of alpha waves, at around  
71 10 Hz, originating from central-posterior cortical areas (Barry et al., 2007; De Gennaro et al., 2016;  
72 Niedermeyer, 2005a). During the early onset of sleep, these alpha oscillations disappear and an  
73 alpha rhythm with a different cortical origin (Broughton and Hasan, 1995) emerges in anterior  
74 regions (Tanaka et al., 1997), while theta power increases, particularly in central regions (Badia et al.,  
75 1994; Niedermeyer, 2005b; Ogilvie, 2001; Wright et al., 1995). Similarly, long-range alpha

76 connectivity disintegrates at the onset of sleep, while lower-frequency theta and delta connectivity  
77 increases (Tanaka et al., 2000, 1998; Wright et al., 1995). Several power and connectivity patterns  
78 have been associated with the loss of consciousness, sometimes specifically with the loss of  
79 responsiveness, such as the anteriorisation of alpha power and connectivity, which has been  
80 described in drug-induced loss of responsiveness (Chennu et al., 2016), and frontoparietal  
81 connectivity, which has been proposed as a key signature of consciousness (Laureys, 2005) and  
82 linked to external awareness (Vanhaudenhuyse et al., 2011). The disruption of frontoparietal  
83 connectivity at alpha (8-12 Hz) frequencies has been shown to occur in disorders of consciousness  
84 (Chennu et al., 2014) and sedation (Chennu et al., 2016). Although it is still debated whether these  
85 are signatures of conscious processing or of processes that almost invariably accompany it (Farooqui  
86 and Manly, 2017), brain connectivity patterns currently provide, in practice, useful insights into the  
87 transitions between levels of consciousness.

88 Another method that can be employed to investigate the rapidly changing global state of the brain is  
89 that of EEG microstates. A microstate represents a quasi-stable spatial topography of electric field on  
90 the scalp (Lehmann, 1990, 1971; Lehmann et al., 1987). The conventional method of analysing  
91 microstates in a dataset involves running an unsupervised clustering algorithm on a set of EEG  
92 topographies of highest variance, followed by labelling of all EEG samples based on the similarity  
93 with the four obtained topographies (Murray et al., 2008; Pasqual-Marqui et al., 1995). Four  
94 consistent (Khanna et al., 2014) EEG microstate topographies have been identified in a large  
95 population of healthy subjects of all ages during resting-state wakefulness (Koenig et al., 2002) and  
96 different microstates have been correlated with different cognitive modalities (Lehmann et al., 2010;  
97 Milz et al., 2015; Seitzman et al., 2016), but also with mental disorders, such as narcolepsy (Kuhn et  
98 al., 2015). A resting-state study of sleep (Brodbeck et al., 2012) identified four EEG microstate  
99 topographies in all stages of sleep nearly identical to those of wakefulness, but occurring with  
100 altered temporal parameters. Notably, increased microstate duration was associated with deeper  
101 sleep. On the contrary, a different study (Cantero et al., 1999) reported a shorter duration of  
102 microstates and suggested a larger repertoire of brain states during the hypnagogic period.  
103 Microstates are thought to reflect momentary, global, synchronised (Koenig et al., 2005) networks of  
104 the brain, reflecting building blocks of large-scale cognitive processing required for the continuous  
105 stream of consciousness (Lehmann, 1990). The neural sources underlying microstates are still being  
106 explored (Britz et al., 2010; Milz et al., 2017; Pascual-Marqui et al., 2014). Still, the dynamics of the  
107 sequence of microstates itself can be seen as a “syntax” of neural activity that is in and of itself an

108 informative tool for modelling and understanding the rapidly-fluctuating global dynamics of the  
109 brain.

110 Brain connectivity and microstates hence provide complementary perspectives on the  
111 neurodynamics underlying the loss of responsiveness as we fall asleep. But what is the relationship  
112 between brain networks and microstates? There is evidence that transient brain networks can be  
113 resolved in electrophysiological data (Baker et al., 2014; Pascual-Marqui et al., 2014; Vidaurre et al.,  
114 2016), but it is an open question whether these networks co-occur with the lifetime of individual  
115 microstates. We investigate for the first time how spectral connectivity and EEG microstate  
116 dynamics interact as we lose responsiveness during drowsiness. We hypothesise that the spectral  
117 changes occurring with the loss of responsiveness mirror those observed in the transition to sleep  
118 (Ogilvie, 2001), anaesthesia (Chennu et al., 2016; Purdon et al., 2013) and in disorders of  
119 consciousness (Chennu et al., 2014): namely, the disintegration of alpha networks, the loss of  
120 posterior alpha power, and the emergence of lower-frequency connectivity and power. Alongside,  
121 building on previous research on EEG microstate dynamics during sleep (Brodbeck et al., 2012), we  
122 hypothesise similar changes in microstate dynamics accompanying the loss of responsiveness during  
123 drowsiness. Finally, given that resting-state network activity is known to fluctuate at millisecond  
124 level, we hypothesise that the neural changes in that occur during drowsiness underlie the dynamics  
125 of both brain networks and the microstates sequence. Specifically, we investigate the possibility that  
126 individual microstates co-occur with distinct transient brain networks, reflecting fleeting changes in  
127 the global state of the brain during drowsiness.

128 To address these questions, we use a subset of data from a previously reported auditory  
129 discrimination task where subjects became drowsy and unresponsive (Kouider et al., 2014). The task  
130 involved pressing a button corresponding to the classification of the auditory stimulus into one of  
131 two categories (object or animal). We obtain five minutes of data before and after the loss of  
132 responsiveness due to drowsiness. We first characterise the responsive and unresponsive periods by  
133 analysing microstate-blind spectral power and connectivity changes in our dataset. Next, we  
134 describe the temporal parameters of EEG microstates during responsiveness and unresponsiveness.  
135 To test whether these parameters can reliably predict responsiveness to individual stimuli, we apply  
136 machine learning to predict responses and misses to stimuli in our task, based only on pre-stimulus  
137 microstate parameters. Finally, we investigate the brain connectivity underlying each of the four  
138 canonical microstates after the loss of responsiveness and highlight a previously unknown  
139 relationship between spectral connectivity and EEG microstates.

## 140 **Methods**

### 141 **Subjects**

142 Sixteen healthy, native English-speaking, right-handed young adults (mean age = 24, S.D. = 2.75; 6  
143 females) were selected for this experiment out of the eighteen subjects from Experiment 1 in a  
144 previous study (Kouider et al., 2014). Two subjects from this dataset were excluded by visual  
145 inspection due to a failure to remain asleep for a period longer than five minutes, as assessed using  
146 responsiveness to stimuli. The participants were directed to not consume stimulants like coffee and  
147 to sleep 1-2 hours less than normally before the experiment. All of the subjects were assessed as  
148 easy sleepers on the Epworth Sleepiness Scale (scores 7-14). The participants signed a consent form  
149 and were reimbursed for their participation. The experiment was approved by the Cambridge  
150 Psychology Research Ethics Committee.

### 151 **Experimental procedure**

152 The stimuli consisted of 96 spoken English words chosen from the CELEX lexical database (Linguistic  
153 Data Consortium, University of Pennsylvania). Half of the words denoted animals and the other half  
154 denoted objects. The subjects were asked to classify each stimulus in its respective category (animal  
155 or object) by pressing a button. The stimuli were presented through headphones, with an average  
156 distance of 8.4 seconds (minimum 6.2 seconds) between consecutive stimuli, as the subjects were  
157 lying with their eyes closed in a reclining chair. To facilitate drowsiness, the task was performed in a  
158 dark, acoustically and electrically shielded EEG room, and the participants were told that they could  
159 fall asleep at any point during the experiment, although they were asked not to stop responding  
160 deliberately while still awake.

### 161 **EEG data acquisition**

162 The electroencephalogram was continuously recorded at 500 samples per second from 64 Ag/AgCl  
163 electrodes (NeuroScan Labs system) positioned and labelled according to the International 10/20  
164 system, with Cz as a reference and including vertical and horizontal electrooculography channels.

### 165 **EEG pre-processing**

166 All analyses that follow were performed using MATLAB scripts (The MathWorks, Inc., Natick,  
167 Massachusetts, US). The EEGLAB toolbox (Delorme and Makeig, 2004) was used to facilitate data  
168 pre-processing.

169 The data was filtered between 1 and 40 Hz and the full channel mean was subtracted from each  
170 channel for baseline correction. The HEOG and VEOG channels were removed. An Independent  
171 Component Analysis (ICA) decomposition was performed using the infomax ICA algorithm (Bell and  
172 Sejnowski, 1995). Components capturing ocular or single-channel artefacts were removed from the  
173 data by visual inspection and considering the correlation with the HEOG and VEOG channels. An  
174 average of 11.6 (S.D. = 8.6) out of 63 components were removed per subject. Channel FT8 was  
175 interpolated using spherical interpolation in all subjects due to being noisy in most recordings.

## 176 **Data segmentation**

177 We classified responsive and unresponsive periods by inspecting the sequence of hits and misses to  
178 individual stimuli. We used a liberal window of 6 seconds to allow for a response to a stimulus,  
179 regardless of its correctness. A lack of response within 6 seconds was marked as a miss. The choice  
180 of a 6-second window for responsiveness was based on our own pilot studies, where we investigated  
181 the longest interval that subjects would make a response during drowsiness in a go task. However,  
182 note that most reaction times were below 3 seconds (Fig. 1) and the reaction times increased  
183 gradually and later in the task, indicating an increase in drowsiness. This was also established in a  
184 previous study on the same data (Kouider et al., 2014).

185 For balance across participants and the two behavioural states, a total of five minutes of  
186 responsiveness and five minutes of unresponsiveness were extracted from each recording (150000  
187 samples per state, per recording), as shown in Fig. 1. The responsiveness period was taken as the  
188 first 0.5 to 5.5 minutes of data in each recording, acquired immediately after the experiment began  
189 and the participants were still alert and wakeful. This was confirmed by checking that the large  
190 majority of the stimuli were followed by responses during this period; a very small number of misses  
191 occurred in more than half of the participants during this period, but they were not contiguous,  
192 suggesting task habituation, uncertainty or attention lapses rather than drowsiness-induced  
193 unresponsiveness. Then, a period of unresponsiveness was selected by visual inspection of the hits  
194 and misses after the end of the responsiveness period, with the aim to find a five-minute interval  
195 consisting of as many misses as possible. If a response was present during the period labelled as  
196 unresponsiveness, the 10 seconds preceding and following the corresponding stimulus were  
197 excluded.



## 198 **Microstate topographies**

199 The idea of electric microstates of the brain comes from the observation that the topography of the  
200 electric field recorded by EEG over the scalp does not fluctuate randomly, but is instead comprised  
201 of short periods of stability (Lehmann, 1971). Four canonical microstates (Koenig et al., 2002),  
202 conventionally labelled A, B, C and D, have been shown to be consistent across recording sessions  
203 (Khanna et al., 2014) and have been repeatedly confirmed in a wide range of health conditions and  
204 cognitive tasks across multiple studies (Britz et al., 2010; Brodbeck et al., 2012; Grieder et al., 2016;  
205 Katayama et al., 2007; Kikuchi et al., 2011; Koenig et al., 1999; Kuhn et al., 2015; Milz et al., 2015;  
206 Nishida et al., 2013; Pascual-Marqui et al., 2014; Schlegel et al., 2012; Strelets et al., 2003; Tomescu  
207 et al., 2014; Van de Ville et al., 2010).

208 To compute the microstate topographies, the Global Field Power (GFP), representing the standard  
209 deviation of the electrode values (Lehmann and Skrandies, 1980), was first computed at each time  
210 point. As the number of GFP peaks varied across subjects and condition, we rounded down the  
211 minimum number of peaks available and retained the first 5000 peaks in each condition  
212 (responsiveness and unresponsiveness) from each recording.

213 The clustering algorithm was implemented in MATLAB and is presented in Box 1. The algorithm is  
214 based on a variant of the method first introduced by (Lehmann et al., 1987), as described in (Murray  
215 et al., 2008), and involves an unsupervised clustering of EEG samples into the specified number of  
216 classes that best explain the input samples. Note that topographical similarity is computed using the  
217 absolute value of the spatial correlation and the polarity of the map is ignored, as topographies with  
218 inverted polarities are produced by the same neural generators (Michel et al., 2009). The maximum  
219 number of iterations was set to 1000 and the GEV delta was set to 1e-9.

220

### Microstate clustering algorithm

Input:  $n$  average-referenced EEG samples ( $n \times \text{number\_of\_channels}$ ) from GFP peaks.

Output:  $k$  maps that best characterise the data.

1. Normalize each input sample to a vector of length 1.
2. Pick  $k$  random samples as the initial maps.
3. Label each sample as  $i \in \{1, \dots, k\}$ , where  $i$  is the index of the map with highest absolute spatial correlation.
4. Re-compute each map  $i$  as the first principal component of each cluster of samples labelled  $i$ .
5. Compute the Global Explained Variance (GEV).
6. If GEV delta is small enough or maximum number of iterations has been reached, end; else, go to 3.

221 Box 1. Microstate clustering algorithm.

222 We initially employed a cross-validation criterion (Pasqual-Marqui et al., 1995) to determine the  
223 optimal number of microstates fitting the data, as performed in several previous studies (Brodbeck  
224 et al., 2012; Koenig et al., 1999). However, we found that the cross-validation criterion produced  
225 different results for when the number of electrodes was down-sampled from 63 to 30 (7 and 4  
226 maps, respectively). This sensitivity of the cross-validation criterion to the number of electrodes has  
227 been documented in previous literature (Murray et al., 2008). Hence, we decided to fix the number  
228 of microstates to four, in line with previous studies that also fix this number a priori (Khanna et al.,  
229 2014; Kikuchi et al., 2007; Koenig et al., 2002; Milz et al., 2015; Schlegel et al., 2012; Strelets et al.,  
230 2003; Tomescu et al., 2014).

### 231 **Microstate labelling**

232 To obtain the sequence of EEG microstates characterising a recording, each EEG sample was  
233 individually assigned to the microstate with the highest corresponding spatial correlation. To correct  
234 for noisy assignments during polarity reversals (Koenig and Brandeis, 2016), we applied a previously-  
235 described temporal smoothing algorithm for the microstate sequence (Pasqual-Marqui et al., 1995)  
236 with parameter  $b$  set to 5, corresponding to a smoothing neighbourhood of 20ms. This parameter  
237 was chosen to be in the range of mean microstate durations found by (Gärtner et al., 2015) using a

238 model of microstate transition processes based on Markov chains (10 ms during wake, 34 ms during  
239 deep sleep).

## 240 **Microstate properties**

241 Following the full labelling of each recording, three properties were computed for each microstate  
242 per state (responsiveness and unresponsiveness) and per recording:

- 243 • The *microstate temporal coverage*, also called the *fractional occupancy*, indicating the  
244 percentage of time spend in one microstate;
- 245 • The *microstate duration*, indicating the average length of continuous sequences labelled as one  
246 microstate;
- 247 • The *Global Explained Variance (GEV)*, which measures the amount of spatial correlation of the  
248 samples with their corresponding microstate topography, scaled by the GFP.

## 249 **Statistics**

250 Interactions between microstate parameters and behavioural state (responsiveness and  
251 unresponsiveness) were performed using a two-way repeated measures ANOVA (Hogg and Ledolter,  
252 1987) with the microstate label and the behavioural state as factors. Sphericity was tested using  
253 Mauchly's test of sphericity (Mauchly, 1940) and, where violated, was corrected using the  
254 Greenhouse-Geisser procedure (Greenhouse and Geisser, 1959). The Tukey-Kramer method (Tukey,  
255 1949) was used to correct for multiple comparisons. After correction, a conventional threshold of  
256  $p=0.05$  was used to assess significance. Unless otherwise specified, similar statistical tests were also  
257 performed for the measures that follow.

## 258 **Responsiveness prediction**

259 We applied machine learning classification to explore whether microstate properties identified in  
260 the ongoing brain dynamics immediately preceding each auditory stimulus in the experimental trials  
261 could predict the presence or absence of a response to that stimulus. All trials were considered for  
262 classification, both within and outside the periods labelled as responsive or unresponsive for the  
263 above microstate analysis.

264 Five seconds of EEG data immediately preceding a stimulus were used to generate the features for  
265 classification. We also investigated using shorter pre-stimulus time periods, down to 1 second of  
266 pre-stimulus data, but we found that classification accuracy increased with a larger amount of pre-  
267 stimulus data over which microstate dynamics could be more accurately estimated. At the same

268 time, the amount of pre-stimulus data was restricted by the overlap with the previous trial. Trials  
269 overlapping with a response corresponding to the previous stimulus were excluded. By setting the  
270 pre-stimulus window to five seconds, less than 10% of the trials were rejected due to overlap with  
271 the previous trial.

272 The input features generated for classification consisted of either individual microstate parameters  
273 computed during the five-second pre-stimulus period in each trial, or a combination of these  
274 parameters. The parameters were those we previously characterised at the group level: namely the  
275 mean duration, mean coverage, and mean GEV for each microstate separately. The classifier was  
276 trained separately with the above individual and combined features. As a baseline, the theta-alpha  
277 ratio was also computed for each trial as the ratio between the total power spectral density at 5-6  
278 and 9.5-10.5 Hz respectively, and used as an input feature for the classifier. The classification label  
279 for each trial was generated by labelling it as either as a timely response (1) or a miss (0).

280 We employed leave-one-subject-out cross-validation to test for the generalisability of the classifier's  
281 performance. For this, the data was split into 16 folds, with one fold corresponding to a single  
282 participant's trials. A support vector machine (SVM) (Christianini and Shawe-Taylor, 2000) with a  
283 radial basis function kernel (Vert et al., 2004) was trained repeatedly by excluding one fold at the  
284 time from the training set and using it as a test set. The SVM was optimised by exhaustive search to  
285 use the optimal value for two parameters: the box constraint, which restricts the number of support  
286 vectors, and the kernel scale, both in the range [0.001, 1000] in logarithmic steps of 10.

287 Platt's method (Platt, 1999) was used to generate class affiliation probabilities from the trained  
288 classifier. These continuously varying probabilities were then used to discriminate between  
289 responses and misses using both the Receiver Operator Characteristic (ROC) area under the curve  
290 (AUC) (Davis and Goadrich, 2006) and the classification accuracy as the percentage of correct  
291 predictions out of the total number of predictions. The classification accuracy was also computed by  
292 setting the class discrimination threshold as the optimal operating point of the ROC curve and  
293 calculating the percentage of correct predictions, using the threshold as a boundary between the  
294 two target classes. We used Wilcoxon signed rank tests (Gibbons and Chakraborti, 2011) to probe for  
295 significant differences between classification performances.

## 296 **Spectral power and connectivity analyses**

297 The spectral power and connectivity during responsiveness and unresponsiveness was investigated  
298 in both microstate-blind and microstate-wise analyses. The power spectral density was computed at

299 each EEG sample between 1 and 20 Hz as the absolute value of the Hilbert transform (Marple, 1999)  
300 of the bandpass filtered data within windows of 0.25 Hz. We performed most of the analysis on 1 to  
301 20 Hz and focused on theta and alpha power, whose ratio has been shown to track the onset of  
302 sleep (Šušmáková and Krakovská, 2007) and has been employed in other studies of drowsiness  
303 (Bareham et al., 2014) or impaired consciousness (Lechinger et al., 2013). Within each recording, the  
304 spectral power values at each frequency bin were averaged and normalised by the total power  
305 within 1 to 20 Hz, thereby obtaining percentages of power contribution at every channel.

306 The connectivity within each pair of channels was analysed using the Weighted Phase Lag Index  
307 (WPLI) (Vinck et al., 2011), a connectivity measure based on the distribution of phase differences  
308 between signals designed to correct for volume conduction, which has been previously used to  
309 investigate brain connectivity during loss of consciousness (Chennu et al., 2016, 2014; Lee et al.,  
310 2013). The WPLI was obtained by pooling over the Hilbert phase of each sample labelled as  
311 belonging to a particular microstate.

312 For both spectral power and connectivity, the median across channels was computed to obtain one  
313 value per microstate and frequency of interest.

314 To further assess topographical changes in connectivity, two sets representing anterior (AFz, Fz, FCz,  
315 AF7, AF3, F1, FC1, F3, FC3, F5, F7, AF8, AF4, F2, FC2, F4, FC4, F6, F8) and posterior (CPz, Pz, POz, Oz,  
316 P1, P2, PO3, PO4, O1, O2, P3, P5, P7, P4, P6, P8, CP3, CP1, CP2, CP4) electrodes were selected for  
317 analysis. Median WPLI connectivity was computed within the anterior and posterior groups  
318 separately for each participant.

## 319 **Results**

### 320 **Behavioural data**

321 The distribution of responsiveness and reaction times over time confirmed that all the subjects were  
322 responsive for a minimum of six minutes in the beginning of the experimental session and became  
323 unresponsive at a later point. During the unresponsiveness period, participants predominantly  
324 reached sleep stage N1, and rarely N2, as detailed in (Kouider et al., 2014). Fig. 1 shows the response  
325 reaction times and the misses in each participant, in addition to the selection of data for the  
326 subsequent microstate analysis. During responsive periods, most subjects had no more than one  
327 miss, with a mean of 2.125% of all responses during this period being misses. The grand average of  
328 reaction times during the responsive period was 1.5s (S.D. = 0.7).

## Reaction times (s) and data selection

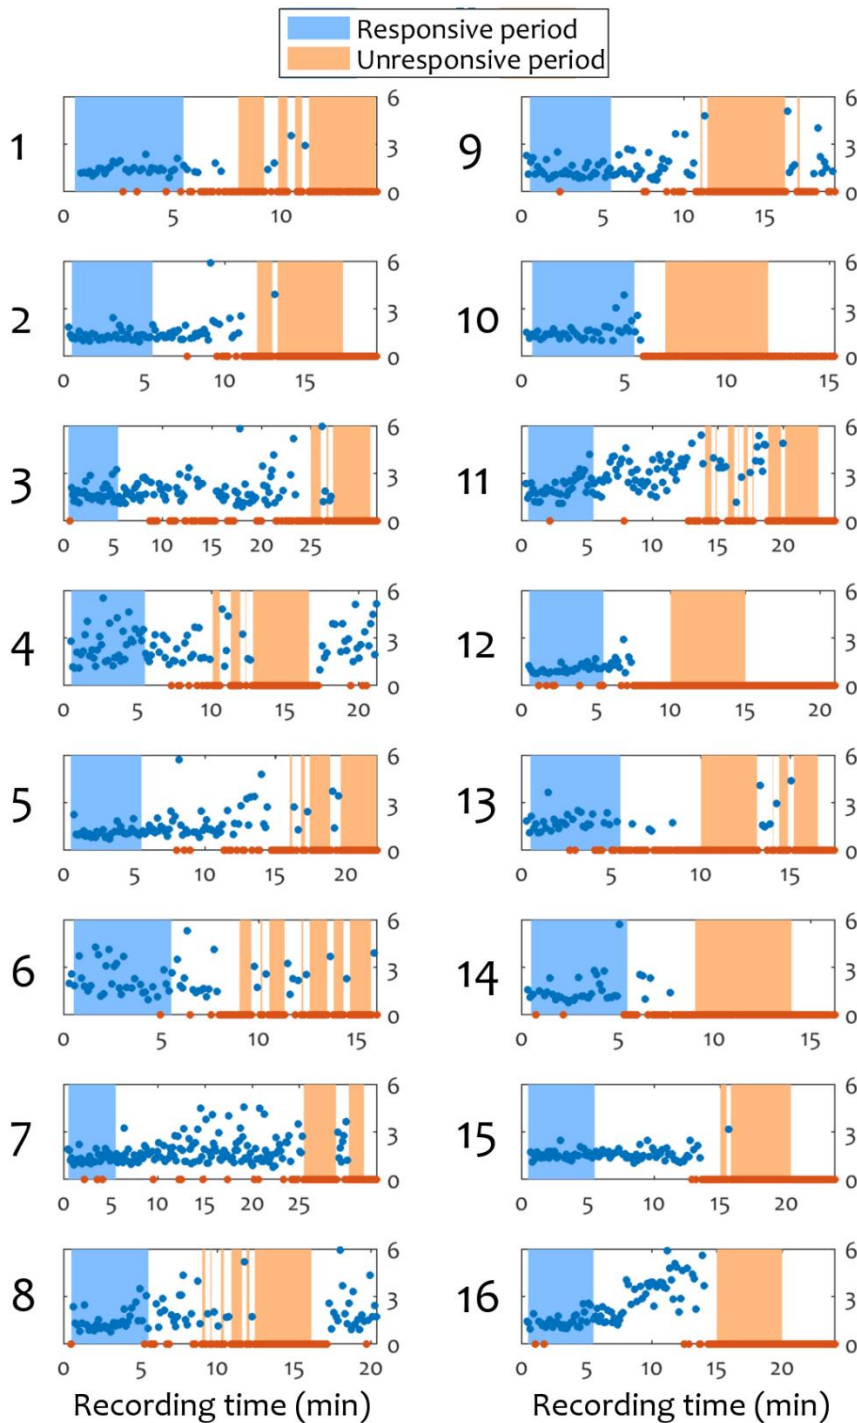

329

330 **Figure 1. Reaction times and data segmentation into responsiveness and unresponsiveness for individual**  
331 **participants.** The horizontal axis represents recording time and the vertical axis represents reaction time in  
332 seconds. Blue markers indicate responses, while orange markers indicate misses. The blue area corresponds to  
333 the five-minute period of responsiveness, while the orange area corresponds to the five-minute period of  
334 unresponsiveness.

### 335 **Spectral power and connectivity dynamics**

336 Before delving into microstate analyses, we characterised the spectral power and connectivity  
337 patterns during responsive and unresponsive periods. We performed a microstate-blind analysis  
338 focusing on previously reported changes related to early sleep, but also anaesthesia and disorders of  
339 consciousness, including the alteration of posterior, frontal and frontoparietal connectivity. We  
340 focused on alpha and theta frequencies, as the theta-alpha ratio has been shown to be the best  
341 discriminator between wake and sleep stage 1 (Šušmáková and Krakovská, 2007), however we also  
342 confirmed that there were no significant differences in the means of power and median connectivity  
343 in beta (12-30 Hz) or gamma (30-40 Hz) between the responsive and unresponsive periods.

344 Based on the peaks present in alpha and theta bands in our data at 5.5 and 10 Hz (also see Fig. 6  
345 below) and in keeping with canonical definitions of EEG frequency bands, we defined the spectral  
346 frequencies of interest in alpha range at 9.5 to 10.5 Hz and the theta frequencies of interest at 5 to 6  
347 Hz, for both power contributions and connectivity.

348 We observed a decrease in mean alpha power contribution ( $t(1,15) = 3.34$ ,  $p = 0.0044$ , Cohen's  $d =$   
349  $0.83$ ) and an increase in mean theta power contribution ( $t(1,15) = 7.1$ ,  $p = 3.5e^{-6}$ , Cohen's  $d = 1.77$ )  
350 going from responsiveness and unresponsiveness. As shown in Suppl. Fig. 1, we noted an alpha peak  
351 in spectral power present around 10 Hz in the large majority of the participants during the  
352 responsive period, which faded during the unresponsive period. Lower-frequency power in the theta  
353 frequency range increased during unresponsiveness. A single notable exception was Subject 12,  
354 whose alpha peak did not shift into theta range during the unresponsive period, however this  
355 subject was preserved in the analysis since there was no evidence that the experiment instructions  
356 were not followed. A grand average topographic plot of power at alpha and theta frequencies (Fig.  
357 2A) revealed that the highest alpha power was located in the posterior area during responsiveness.  
358 During unresponsiveness, theta power was highest in posterior channels.

359 Investigating frontoparietal connectivity in alpha and theta frequencies (Fig. 2B) using the WPLI, we  
360 observed the disintegration of long-range connections between frontal and parietal areas going from  
361 responsiveness to unresponsiveness at alpha frequencies. A paired t-test confirmed that the median  
362 alpha connectivity between the anterior and posterior channels was significantly higher during  
363 responsiveness ( $t(1, 15) = 3.4$ ,  $p = 0.003$ , Cohen's  $d = 0.85$ ). At the same time, an overall increase in  
364 median frontoparietal connectivity was observed in theta frequencies in unresponsiveness, but this  
365 was not significant ( $t(1, 15) = 0.4$ ,  $p = 0.69$ , Cohen's  $d = 0.1$ ).

## A. Spectral power contribution

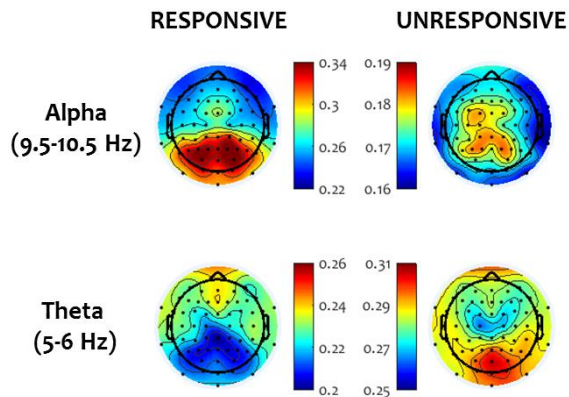

## B. Frontoparietal WPLI connectivity

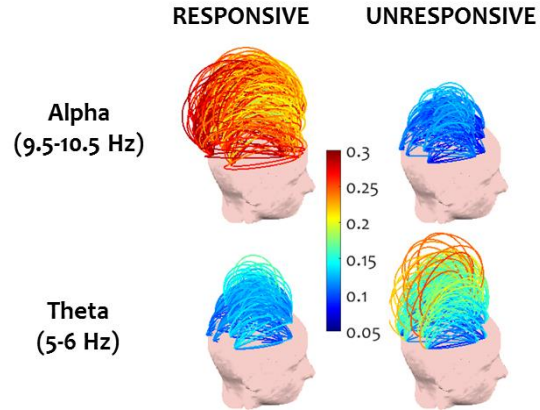

366

367 **Figure 2. Spectral power topography and WPLI frontoparietal connectivity at alpha (9.5-10.5 Hz) and theta**  
368 **(5-6 Hz) peaks before and after the loss of responsiveness. Values are averaged across participants.**

## 369 Microstate topographies

370 It has previously been shown that microstate topographies are highly similar in wakefulness and  
371 sleep (Brodbeck et al., 2012). Hence, we applied the microstate clustering algorithm on the set of  
372 combined samples from the responsive and unresponsive periods from each subject, in order to  
373 obtain four microstate topographies. The resulting maps matched the four canonical microstate  
374 topographies commonly described in literature, denoted by letters A to D (Koenig et al., 2002) (Fig.  
375 3). A breakdown of microstate topographies obtained for individual participants is also shown in  
376 Suppl. Fig. 3.

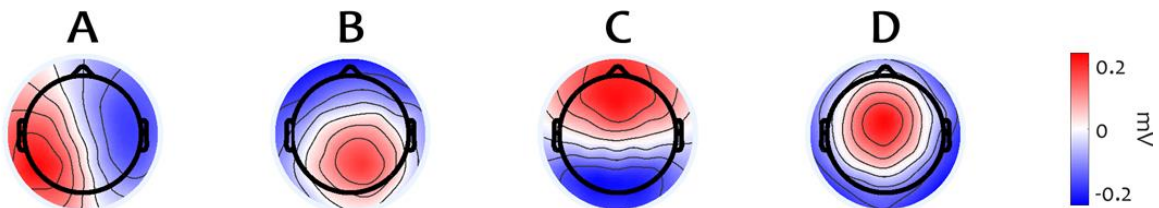

377

378 **Figure 3. Microstate topographies computed across all subjects.**

## 379 Microstate parameters

380 Having established the topography of the canonical microstates, we next investigated whether the  
381 dynamics of the rapid succession of microstates in the EEG remains the same before and after the  
382 loss of responsiveness. We computed the duration, the temporal coverage and the global explained  
383 variance (GEV) of each microstate during responsiveness and during unresponsiveness (Fig. 4).



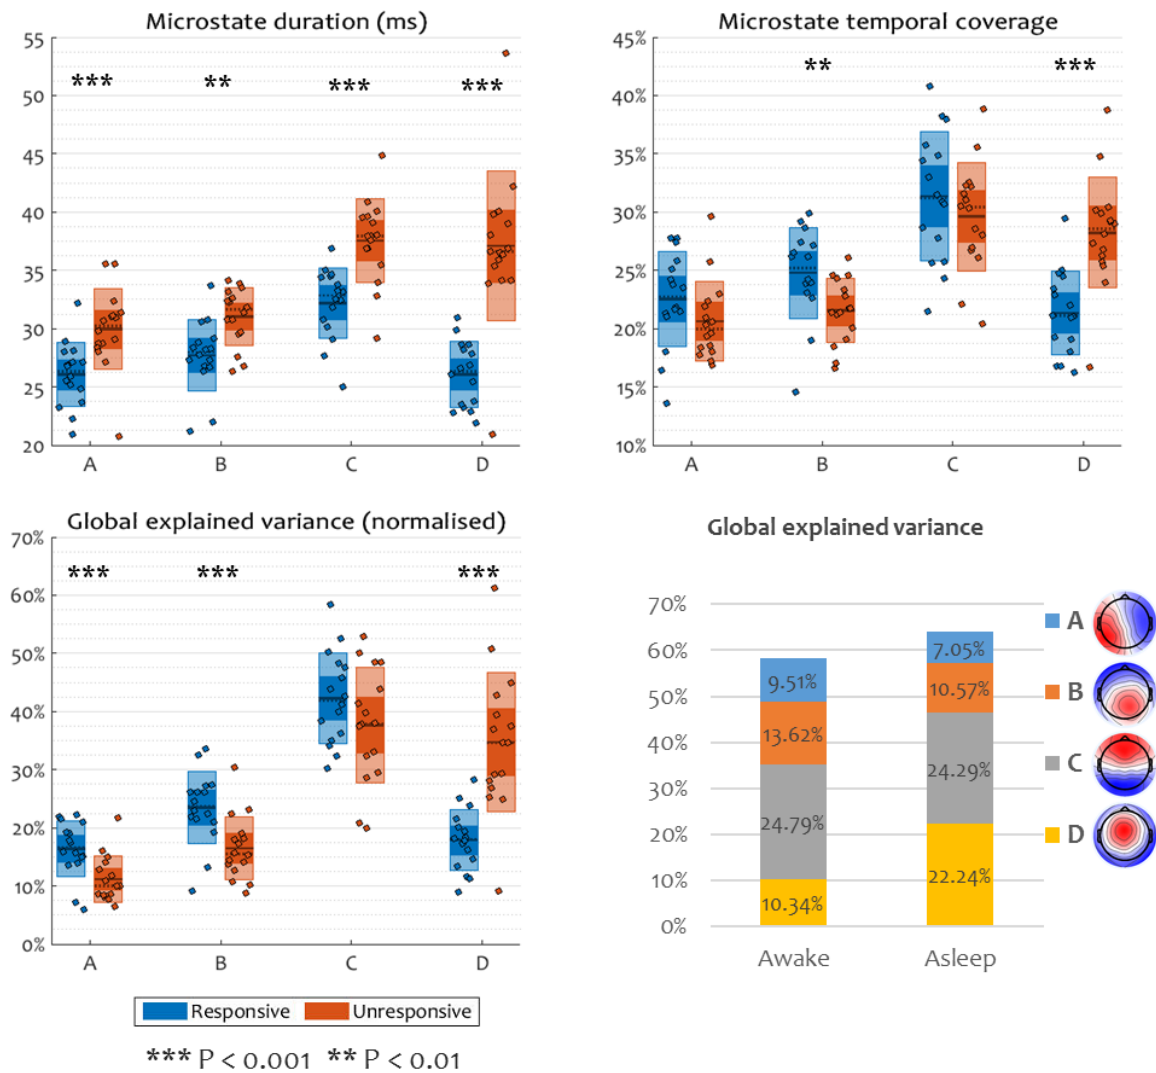

384

385 **Figure 4. Microstate parameters before and after the loss of responsiveness in drowsiness.** Within each  
 386 group, inner boxes represent the standard error of the mean, outer boxes represent the standard deviation,  
 387 the mean is shown by a continuous line, the median is shown by a dotted line, and individual participant values  
 388 are shown as dots. Asterisks show a significant main effect of state within a microstate.

389 A repeated measures ANOVA with the microstate and the behavioural state (responsiveness and  
 390 unresponsiveness) as factors found significant interactions between microstate and behavioural  
 391 state in all of the three microstate parameters investigated: duration ( $F_{interaction} = 16.73$ ,  
 392  $P_{interaction} = 2e^{-7}$ , Cohen's  $d = 2.11$ ), temporal coverage ( $F_{interaction} = 13.08$ ,  $P_{interaction} = 3e^{-6}$ ,  
 393 Cohen's  $d = 1.86$ ) and GEV ( $F_{interaction} = 17.95$ ,  $P_{interaction} = 8e^{-8}$ , Cohen's  $d = 2.18$ ). Further exploring the  
 394 simple effect of state on the parameters within each microstate, the ANOVA revealed that the  
 395 duration of all microstates was significantly increased during unresponsiveness ( $P_{state, A} = 0.0001$ ,  
 396  $P_{state, B} = 0.003$ ,  $P_{state, C} = 0.0001$ ,  $P_{state, D} = 3e^{-6}$ ), in agreement with previous literature (Brodbeck et al.,

397 2012). Notably, microstate D had a striking increase in duration. At the same time, the temporal  
398 coverage of class D was significantly higher during unresponsiveness, whereas the coverage of  
399 microstate B was significantly lower during the same period ( $P_{state, A} = 0.056$ ,  $P_{state, B} = 0.001$ ,  $P_{state, C} =$   
400  $0.26$ ,  $P_{state, D} = 1e^{-5}$ ). Similarly, the GEV of microstate D was increased during unresponsiveness, while  
401 the GEV of microstates A and B were decreased ( $P_{state, A} = 0.0002$ ,  $P_{state, B} = 0.0002$ ,  $P_{state, C} = 0.17$ ,  $P_{state,$   
402  $D} = 2e^{-5}$ ).

### 403 **Single-trial responsiveness prediction**

404 Having characterised the temporal changes in microstate dynamics before and after the loss of  
405 responsiveness, we proceeded to verify whether microstate parameters are able to dissociate  
406 responsiveness from unresponsiveness at individual trial level during the full recordings, and  
407 whether these properties could be generalised across subjects.

408 Out of all trials, 8% contained a button press event during the five seconds preceding each stimulus  
409 and were excluded from further analysis. The remaining data had a balanced distribution of 1078  
410 responses and 1117 misses out of a total of 2195 trials.

411 Training a radial basis function kernel support-vector machine repeatedly on the combined-  
412 microstate and microstate-wise features to predict the binary outcome of a trial, as a response or a  
413 miss, using one-subject-out cross-validation, confirmed that microstate dynamics were able to  
414 predict responsiveness at individual trial level and across subjects, with a performance similar to that  
415 of the established theta-alpha ratio of spectral power (Fig. 5).

416 Combining the duration, temporal coverage, and GEV of each microstate to obtain a 4 x 5 input  
417 feature vector or each trial achieved a mean AUC of 0.8552 (mean classification accuracy of 75.2%).  
418 In comparison, the theta-alpha ratio achieved a mean AUC of 0.8519 (mean classification accuracy of  
419 74.24%). A Wilcoxon signed rank test did not find significant differences between these performance  
420 distributions. When combined, the microstate features and the theta-alpha ratio obtained a mean  
421 AUC 0.8622 (mean classification accuracy of 77.1%).

422 When used individually as input features for the classification, mean microstate duration performed  
423 remarkably well, achieving a mean AUC 0.8484 (mean classification accuracy of 76.1%). According to  
424 Wilcoxon test, this was not significantly different from the classification performance of the  
425 combined microstate parameters. The duration of microstate D was significantly better at predicting  
426 responsiveness than microstates A-C ( $p_{D-(A,B,C)} = \{0.0005, 0.0006, 0.002\}$ ).

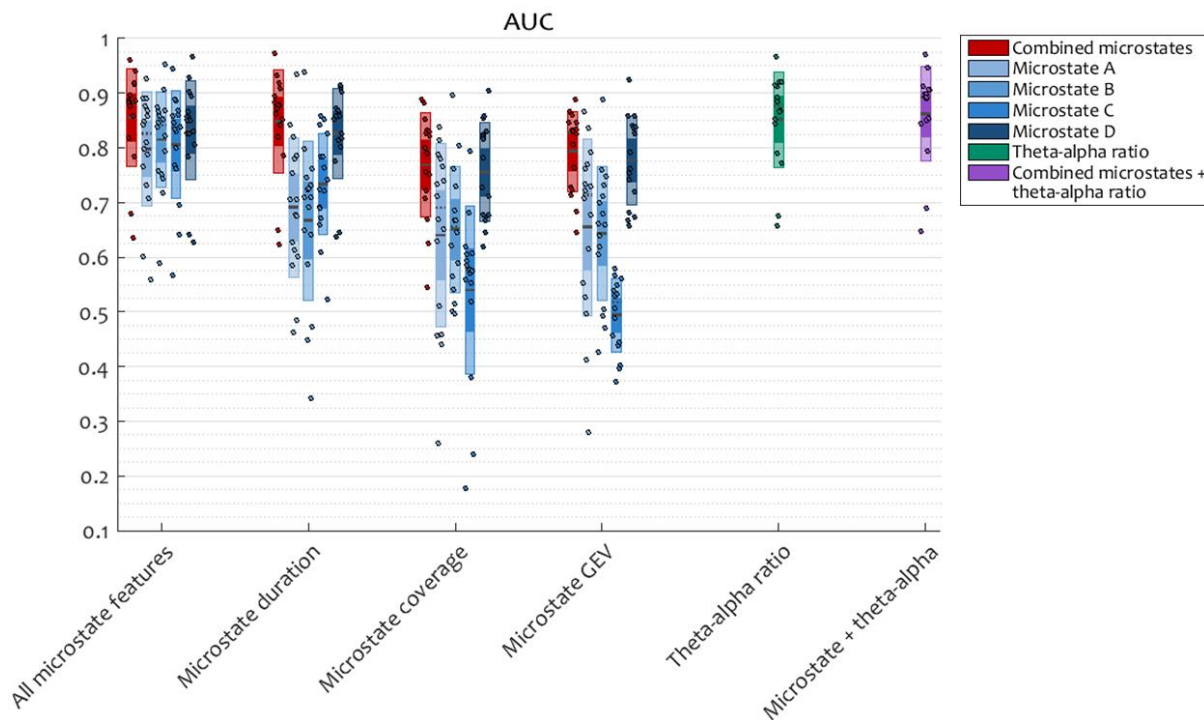

427

428 **Figure 5. Classification performance, computed as the area under the ROC curve, for a support-vector**  
429 **machine (SVM) trained using 5 seconds of pre-stimulus data to classify responses and misses.** Input features  
430 are microstate parameters or the theta-alpha ratio, individually or combined. Within each group, inner boxes  
431 represent the standard error of the mean, outer boxes represent the standard deviation, the mean is shown by  
432 a continuous line, the median is shown by a dotted line, and individual participant values are shown as dots.

433 It is worth noting that the one subject for whom the prediction performance was lower in the group  
434 was Subject 12, who was also the only one whose alpha peak remained nearly unshifted after the  
435 loss of responsiveness (Suppl. Fig. 1).

436 Taken together, these results indicate that spatiotemporal microstate parameters characterising the  
437 pre-stimulus period are indeed informative of the ability of a subject to make a response, similar to  
438 the established theta-alpha ratio of the power spectral density. Confirming the initial findings of a  
439 more prominent presence of microstate D before the loss of responsiveness due to drowsiness, this  
440 microstate also appears to be particularly informative of the capacity of a subject to react to a  
441 stimulus. Crucially, these results are generalizable across subjects and valid at single trial level.

#### 442 **Connectivity differences between microstates**

443 Having established the characteristic temporal patterns exhibited by microstate sequences before  
444 and after drowsiness-induced loss of responsiveness, we next proceeded to investigate their  
445 relationship with the underlying spectral content of the EEG, and the modulation of this relationship

446 as subjects become unresponsive. To this end, we investigated the power contributions and the  
447 WPLI connectivity computed across samples belonging to each microstate before and after the loss  
448 of responsiveness. While we do not assume a direct relation between neural sources of EEG  
449 microstates and EEG spectral power and connectivity, our aim is to assess whether the neural  
450 sources of microstates and sources of spectral measures covary at a fine temporal scale.

451 The spectral power contribution (Fig. 6A) displayed the characteristic alpha peak around 10 Hz  
452 during the responsive period, which faded during the unresponsive period into high power at low  
453 frequencies. This pattern was similar during all microstates.

454 Likewise, spectral connectivity (Fig. 6B) showed a peak at 10 Hz during responsiveness during all  
455 microstates, which faded during unresponsiveness. The only pattern dissociating between  
456 microstates during responsiveness was a decreased 10 Hz peak during microstate A. On the other  
457 hand, there was a noticeable difference in the level of connectivity during unresponsiveness  
458 between all microstate periods, with microstates D and A exhibiting the highest and the lowest  
459 connectivity, respectively.

460 The effect size of the interaction between microstate and behavioural state (responsiveness and  
461 unresponsiveness) computed individually at each frequency was indeed generally higher in  
462 connectivity than in power (Fig. 6C). The effect size was largest in connectivity at 5.5 Hz and 10 Hz,  
463 corresponding to the theta and alpha peaks displayed during all microstates during the unresponsive  
464 and responsive periods, respectively. A peak in power contribution was also found at 13.5 Hz,  
465 potentially due to the emergence of sleep spindles at the onset of sleep.

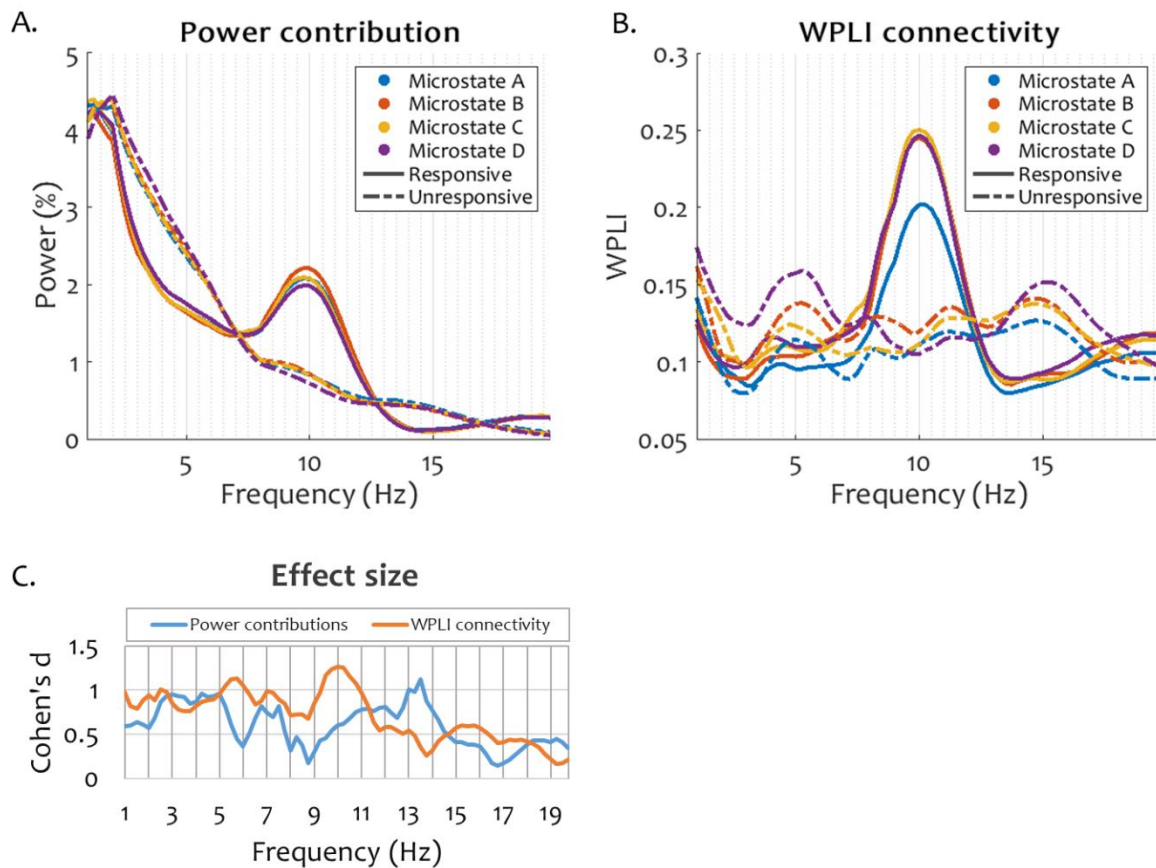

466

467 **Figure 6. Spectral power contribution (panel A) and WPLI connectivity (panel B) captured during individual**  
468 **microstates before and after loss of responsiveness due to drowsiness.** Within each subject, for both power and  
469 and connectivity, the median across channels was calculated. The figures show the grand average over all  
470 subjects. Panel C shows the main effect size, computed as Cohen's d, of the interaction between behavioural  
471 state and microstate at each frequency bin for power contributions and for connectivity.

472 We also attempted to use pre-stimulus WPLI connectivity levels at alpha and theta frequencies in  
473 order to train a classifier to predict responsiveness, using the same procedure as for the microstate  
474 spatiotemporal parameters. Intriguingly, no classifiers could be obtained that exceeded a 60% mean  
475 accuracy, either microstate-wise or on the full set of pre-stimulus samples.

#### 476 **Connectivity during microstate D after the loss of responsiveness**

477 Gathering from the evidence of increased temporal presence of microstate D after the loss of  
478 responsiveness, as well as the higher connectivity displayed during this microstate during  
479 unresponsiveness in comparison with the microstates A-C, we next sought to understand the  
480 spectral connectivity patterns captured during microstate D in the selected alpha and theta ranges  
481 during the unresponsiveness period.

482 Preliminary assessments of connectivity patterns during the four microstates during  
483 unresponsiveness revealed visual differences in anterior and posterior connectivity during  
484 microstate D as compared to microstates A-C. Considering previous literature (Morikawa et al.,  
485 1997; Tanaka et al., 2000, 1998; Wright et al., 1995) suggesting that key changes in connectivity  
486 related to the onset of sleep occur topographically in anterior and posterior scalp regions of interest  
487 (ROI), as well as frontoparietal having been proposed as a key signature of consciousness (Laureys,  
488 2005), we decided to investigate the within-anterior, within-posterior and between anterior-  
489 posterior connectivity during microstate D in comparison with microstates A-C. For this purpose, we  
490 performed three repeated measures ANOVA tests to compare the median connectivity during  
491 microstate D and that during each of the microstates A-C in each of the six conditions (two  
492 frequency bands X three scalp ROIs) during the unresponsive period. Within each condition, we  
493 corrected for the false discovery rate across the three tests (D vs A, D vs B and D vs C) using Storey's  
494 procedure (Storey, 2002).

495 Fig. 7 exemplifies the most prominent differences we found in connectivity between samples  
496 covered by microstate D and microstates A-C respectively, during unresponsiveness.

## WPLI connectivity during unresponsiveness

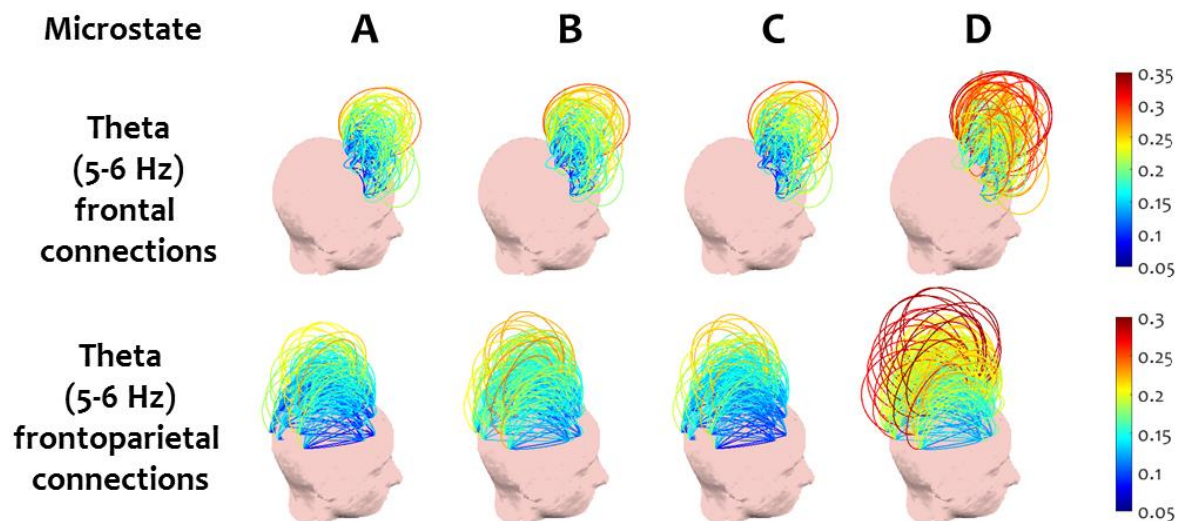

497

498 **Figure 7. Frontal and frontoparietal WPLI connectivity at theta peak (5-6 Hz).** Microstate D captures  
499 significantly higher connectivity in these examples compared to microstates A-C.

500 At the selected theta peak, the t-test results showed significantly higher median connectivity within  
501 the anterior region during microstate D compared to each of the other microstates ( $P_{D-\{A,B,C\}} = \{0.001,$   
502  $0.008, 0.001\}$ ,  $t_{D-\{A,B,C\}} = \{3.958, 3.069, 4.088\}$ , Cohen's  $d_{D-\{A,B,C\}} = \{0.990, 0.767, 1.022\}$ ). Median

503 connectivity between the anterior and posterior regions was also significantly higher during  
504 microstate D than in microstates A and C ( $P_{D-\{A,B,C\}} = \{0.003, 0.297, 0.003\}$ ,  $t_{D-\{A,B,C\}} = \{3.578, 1.081,$   
505  $3.392\}$ , Cohen's  $d_{D-\{A,B,C\}} = \{0.894, 0.27, 0.848\}$ ). No significant differences were found in median  
506 connectivity within the posterior area.

507 Conversely, at the selected alpha peak, the repeated measures ANOVA showed significantly lower  
508 median connectivity within the posterior area during microstate D compared to microstates A-C  
509 ( $P_{D-\{A,B,C\}} = \{0.033, 0.037, 0.033\}$ ,  $t_{D-\{A,B,C\}} = \{2.686, 2.294, 2.559\}$ , Cohen's  $d_{D-\{A,B,C\}} = \{0.672, 0.573, 0.67\}$ ).  
510 At the same time, microstate D captured significantly higher within-anterior median connectivity  
511 than microstate A ( $P_{D-\{A,B,C\}} = \{0.043, 0.617, 0.055\}$ ,  $t_{D-\{A,B,C\}} = \{2.769, 0.511, 2.297\}$ , Cohen's  
512  $d_{D-\{A,B,C\}} = \{0.692, 0.128, 0.574\}$ ). No significant difference in median connectivity between anterior  
513 and posterior regions was found during microstate D compared to microstates A-C.

514 These results confirmed that the timecourse of microstate D uniquely capture a simultaneous  
515 disintegration of posterior alpha connectivity and emergence of frontal theta connectivity, which is  
516 associated with the suppression of responsiveness at the onset of sleep.

## 517 Discussion

### 518 Summary

519 In this study, we used high-density EEG to explore the transient spatiotemporal and spectral  
520 dynamics of electrical brain activity before and after the loss of behavioural responsiveness due to  
521 drowsiness. Importantly, we examined the loss of responsiveness as we fall asleep, as opposed to an  
522 investigation of canonical sleep stages. Here, unresponsiveness – the failure to respond to the  
523 auditory cues elicited by increased drowsiness – provided an objective and non-invasive behavioural  
524 criterion in the transitional stage in between full wakefulness and early sleep.

525 We began by showing differences in spectral power and connectivity after the loss of responsiveness  
526 that have been previously shown to differentiate between healthy wakefulness and sleep, sedation  
527 and disorders of consciousness: a decrease in posterior alpha power and the emergence of theta  
528 power, as well as the disintegration of frontoparietal connectivity in alpha band. We then  
529 characterised the spatiotemporal parameters of the four canonical EEG microstates before and after  
530 the loss of responsiveness. We showed that microstate parameters not only correlate with  
531 behaviour at the group level, but also predict behaviour at the level of individual experimental trials.  
532 The ongoing microstate dynamics, particularly the properties of microstate D, before the onset of an  
533 auditory stimulus in an experimental trial significantly predicted the likelihood of a response to that

534 auditory stimulus as participants transitioned towards sleep. Specifically, when microstate D  
535 occurred more often during the pre-stimulus period, participants were less likely to generate a  
536 response to the subsequent stimulus. This relationship highlights a possible functional role of this  
537 microstate in modulating behaviour, and the predictive power of this signature to define the  
538 capacity to consciously respond to abstract/semantic stimuli. Finally, we examined the spectral  
539 power and connectivity characteristics captured during the lifetimes of the four canonical EEG  
540 microstates. We discovered that while the distribution of spectral power remains the same across  
541 the temporal microstates, spectral connectivity has distinct profiles. We showed that this non-  
542 uniform pattern of connectivity across microstates is modulated specifically after the loss of  
543 responsiveness: the timecourse of microstate D captured significantly increased connectivity in the  
544 theta band after the loss of responsiveness, underpinning a novel profile of interaction between the  
545 temporal sequence of microstates and spectral brain connectivity.

#### 546 **Alpha power and connectivity characterise responsive wakefulness**

547 Our analysis of EEG connectivity before microstate segmentation strengthens the evidence for the  
548 fundamental role of the frontoparietal alpha networks in sustaining a state of responsive  
549 wakefulness (Laureys, 2005). Alpha band frontoparietal connections have also been shown to  
550 disintegrate in disorders of consciousness (Chennu et al., 2014) and sedation (Chennu et al., 2016).  
551 Importantly, it is not the full disappearance of all frontoparietal connectivity that drives the loss of  
552 responsiveness, but specifically connectivity at alpha frequency. Indeed, literature shows that  
553 connectivity shifts from alpha into lower-frequency theta and delta frequencies as consciousness  
554 fades (Chennu et al., 2016, 2014; Ogilvie, 2001; Tanaka et al., 2000, 1998; Wright et al., 1995). In the  
555 larger picture of states and levels of consciousness, our findings confirm long-range alpha networks  
556 as a common marker of consciousness, whether this impairment is natural (sleep), pathological  
557 (disorders of consciousness) or pharmacological (sedation).

#### 558 **Microstate D predicts responsiveness across subjects**

559 Upon examining the spatiotemporal parameters of the canonical EEG microstates, we found an  
560 increase in temporal coverage after the loss of responsiveness uniquely specific to microstate D,  
561 along with an increase in its global explained variance, as compared to responsive periods. While the  
562 duration of all microstates was longer during unresponsiveness, the duration of microstate D had a  
563 prominent relative increase. In contrast, the temporal coverage of microstate B decreased in the  
564 unresponsive period, as did the global explained variance of microstates A and B. Further, we  
565 demonstrated that pre-stimulus parameters of EEG microstate sequences are indeed informative of



566 the capacity of a subject to respond to a stimulus during drowsiness at individual trial level. Again,  
567 the special significance of microstate D during unresponsiveness was visible from its increased ability  
568 to predict the likelihood of a response, in comparison with microstates A-C. In addition, we showed  
569 that the increase in duration of this microstate is the best predictor of responsiveness among all the  
570 microstate parameters.

571 Our usage of machine learning allows us to quantify the performance of the model using its  
572 discrimination accuracy, which speaks for the real-world applicability of the method (Breiman,  
573 2001). Moreover, one-subject-out cross-validation allows us to infer that these results are  
574 generalizable across people. At the same time, as expected, individual variability caps the maximum  
575 possible accuracy when predicting responsiveness. Our results suggest that this cap is around an  
576 accuracy of 75% (mean AUC around 0.85). Interestingly, the theta-alpha ratio, which we used as a  
577 baseline given its sensitivity as a sleep index (Šušmáková and Krakovská, 2007), achieved a similar  
578 classification accuracy as the microstate-based input features. Intriguingly, we were not able to use  
579 frontoparietal connectivity as a feature to train a suitable classifier for responsiveness during  
580 drowsiness, either considering or ignoring the microstate sequence, despite strong evidence of  
581 major connectivity changes occurring before and after the loss of responsiveness. This suggests that  
582 connectivity better predicts the level of consciousness estimated over longer time scales, whereas  
583 spatiotemporal microstate dynamics capture short-term changes in brain state that predict  
584 responsiveness.

### 585 **Microstate D captures a distinct connectivity profile after loss of responsiveness**

586 Alongside the distinctive increase in temporal coverage and duration of microstate D, we found a  
587 singular spectral connectivity pattern during this microstate after loss of responsiveness, indicating  
588 increased median connectivity in theta band, particularly in frontal and frontoparietal connections.  
589 At the same time, median posterior connectivity during microstate D was reduced during  
590 unresponsiveness. Hence, the timecourse of microstate D appears to uniquely capture a connectivity  
591 pattern specific to deeper stages of sleep, in comparison with other microstates present during the  
592 same sleep stage. (Britz et al., 2010) have previously reported the lack of any interaction between  
593 temporal microstates of the brain and the spectral power of its oscillations, i.e, the spectral power  
594 profiles of EEG microstates do not differ from each other, a finding which we replicated. In contrast,  
595 we have shown that spectral connectivity presents a significant interaction with temporal  
596 microstates, underpinned by the connectivity captured by microstate D.

597 There currently exists no consensus on the meaning of individual microstates in terms of their neural  
598 generators. However, microstate D has occasionally been linked to attentional networks. In a study  
599 of BOLD resting-state networks, (Britz et al., 2010) showed a higher correlation of microstate D with  
600 ventral and dorsal frontal-parietal networks, functionally associated with attention switching and  
601 directing attention towards external salient stimuli. A decreased duration of this microstate has  
602 been reported in schizophrenia (Koenig et al., 1999; Lehmann et al., 2005; Nishida et al., 2013;  
603 Tomescu et al., 2014) and hallucination (Kindler et al., 2011) – two conditions involving impairments  
604 in task switching and attention (Collerton et al., 2005; Cornblatt and Keilp, 1994). An investigation of  
605 modalities of thinking found an increased microstate D duration in resting-state compared to visual  
606 and verbal task periods (Milz et al., 2015); this was also interpreted as a confirmation of the  
607 previously-mentioned study by (Britz et al., 2010) due to a higher probability of attention switching  
608 during rest (high microstate D duration), as opposed to performing a single goal-oriented task (lower  
609 microstate D duration). On the other hand, (Seitzman et al., 2016) have found an increased duration  
610 of microstate D during a cognitive task as compared to wakeful rest.

611 Given the weak evidence in the literature associating microstate D with task-related attention  
612 networks, we are cautious in interpreting our findings on this basis. A previous study on the same  
613 data (Kouider et al., 2014) found that a correct response to stimuli is still prepared during  
614 unresponsiveness, suggesting preserved attention. It is possible that our findings indicate more  
615 demand from attention networks as drowsiness increases and subjects become unable to respond to  
616 the task. In study of microstates during sleep in the absence of any task, (Brodbeck et al., 2012) did  
617 not observe an increase in this microstate during sleep. This suggests that microstate D might indeed  
618 be specifically related to the experimental task. Further, this interpretation is compatible with a  
619 study by Katayama et al. (Katayama et al., 2007), which found that the duration of microstate D was  
620 increased in light (but not deep) hypnosis, a state which produces similar EEG patterns to sleep-  
621 induced unresponsiveness (Barker and Burgwin, 1949).

622 Nonetheless, the spatiotemporal and spectral connectivity dynamics observed in microstate D after  
623 the loss of responsiveness yield an important insight into the dynamics of the transition to sleep.  
624 While connectivity averaged during all microstates reflects typical changes commonly found in the  
625 loss of consciousness in the onset of sleep, anaesthesia or disorders of consciousness – weaker alpha  
626 and stronger theta long-range networks – the individual timecourse of microstate D captures  
627 significantly stronger patterns, despite having a duration no longer than 40ms. This suggests that,  
628 after the loss of responsiveness, the process of falling asleep is not necessarily linear, but rather  
629 consists of an interplay between distinct networks, captured by different microstates, which are

630 different points along the transition between wakeful and asleep modes of operation. This finding  
631 might lend itself to explaining one of the current riddles of sleep research: why is it that, despite the  
632 establishment of a series of clear EEG markers delimiting wake and several stages of sleep, finding an  
633 EEG-based threshold to separate between the subjective intuition of being awake or asleep has not  
634 yet been achieved? Indeed, it has been reported by Hori et al. (1994) that 26% of all subjects assess  
635 that they had been awake at times when their EEG was classified as stage 2 sleep, which is  
636 commonly used to define “true sleep” (Ogilvie, 2001). The rapid fluctuation of brain networks, some  
637 of which are closer to wakefulness (during microstates A-C) and others closer to sleep (during  
638 microstate D) could be the reason why our momentary introspective state of being “awake” and  
639 “asleep” might not concur with a coarse-grained assessment of EEG over many seconds of data, as  
640 usually done during the identification of sleep stages. Instead, our findings here highlight that  
641 further research should focus on the rapidly changing dynamics of brain networks that appear to  
642 capture key dynamics relevant to our behavioural and perhaps even introspective state, as we drift  
643 into unconsciousness.

## 644 **Acknowledgements**

645 We thank Louise Goupil for collecting the data for this experiment.

## 646 **References**

- 647 Alkire, M.T., Hudetz, A.G., Tononi, G., 2008. Consciousness and Anesthesia. *Science* (80-. ). 322, 876–880.
- 648 Badia, P., Wright, K.P.J., Wauquier, A., 1994. Fluctuations in single-hertz EEG activity during the transition to  
649 sleep. *Sleep onset Norm. Abnorm. Process.* 201–218.
- 650 Baker, A.P., Brookes, M.J., Rezek, I. a., Smith, S.M., Behrens, T., Smith, P.J.P., Woolrich, M., 2014. Fast transient  
651 networks in spontaneous human brain activity. *Elife* 2014, 1–18.
- 652 Bareham, C. a, Manly, T., Pustovaya, O. V, Scott, S.K., Bekinschtein, T. a, 2014. Losing the left side of the world:  
653 rightward shift in human spatial attention with sleep onset. *Sci. Rep.* 4, 5092.
- 654 Barker, W., Burgwin, S., 1949. Brain wave patterns during hypnosis, hypnotic sleep and normal sleep. *Arch.*  
655 *Neurol. Psychiatry* 62, 412–20.
- 656 Barry, R.J., Clarke, A.R., Johnstone, S.J., Magee, C.A., Rushby, J.A., 2007. EEG differences between eyes-closed  
657 and eyes-open resting conditions. *Clin. Neurophysiol.* 118, 2765–73.
- 658 Bell, A., Sejnowski, T.J., 1995. Fast blind separation based on information theory. *Proc. Intern. Symp. Nonlinear*  
659 *Theory ...* 1, 43–47.

- 660 Block, N., 1996. How can we find the neural correlate of consciousness? *Trends Neurosci.* 19, 456–9.
- 661 Britz, J., Van De Ville, D., Michel, C.M., 2010. BOLD correlates of EEG topography reveal rapid resting-state  
662 network dynamics. *Neuroimage* 52, 1162–1170.
- 663 Brodbeck, V., Kuhn, A., von Wegner, F., Morzelewski, A., Tagliazucchi, E., Borisov, S., Michel, C.M., Laufs, H.,  
664 2012. EEG microstates of wakefulness and NREM sleep. *Neuroimage* 62, 2129–2139.
- 665 Broughton, R., Hasan, J., 1995. Quantitative topographic electroencephalographic mapping during drowsiness  
666 and sleep onset. *J. Clin. Neurophysiol.* 12, 372–386.
- 667 Cantero, J.L., Atienza, M., Salas, R.M., Gómez, C.M., 1999. Brain spatial microstates of human spontaneous  
668 alpha activity in relaxed wakefulness, drowsiness period, and REM sleep. *Brain Topogr.* 11, 257–263.
- 669 Chennu, S., Finoia, P., Kamau, E., Allanson, J., Williams, G.B., Monti, M.M., Noreika, V., Arnatkeviciute, A.,  
670 Canales-Johnson, A., Olivares, F., Cabezas-Soto, D., Menon, D.K., Pickard, J.D., Owen, A.M., Bekinschtein,  
671 T. a., 2014. Spectral Signatures of Reorganised Brain Networks in Disorders of Consciousness. *PLoS*  
672 *Comput. Biol.* 10, e1003887.
- 673 Chennu, S., O'Connor, S., Adapa, R., Menon, D.K., Bekinschtein, T.A., 2016. Brain Connectivity Dissociates  
674 Responsiveness from Drug Exposure during Propofol-Induced Transitions of Consciousness. *PLOS*  
675 *Comput. Biol.* 12, e1004669.
- 676 Christianini, N., Shawe-Taylor, J., 2000. Support vector machines. Cambridge University Press, Cambridge, UK.
- 677 Collerton, D., Perry, E., McKeith, I., 2005. Why people see things that are not there: a novel Perception and  
678 Attention Deficit model for recurrent complex visual hallucinations. *Behav. Brain Sci.* 28, 737-57-94.
- 679 Cornblatt, B.A., Keilp, J.G., 1994. Impaired attention, genetics, and the pathophysiology of schizophrenia.  
680 *Schizophr. Bull.* 20, 31–46.
- 681 Davis, J., Goadrich, M., 2006. The Relationship Between Precision-Recall and ROC Curves. *Proc. 23rd Int. Conf.*  
682 *Mach. Learn. -- ICML'06* 233–240.
- 683 De Gennaro, L., Ferrara, M., Curcio, G., Cristiani, R., 2016. Antero-posterior EEG changes during the  
684 wakefulness and sleep transition. *Clin. Neurophysiol.* 112, 1901–1911.
- 685 Delorme, A., Makeig, S., 2004. EEGLAB: An open source toolbox for analysis of single-trial EEG dynamics  
686 including independent component analysis. *J. Neurosci. Methods* 134, 9–21.
- 687 Farooqui, A.A., Manly, T., 2017. When Attended and Conscious Perception Deactivates Fronto-Parietal  
688 Regions. *Cortex* 1–14.
- 689 Gärtner, M., Brodbeck, V., Laufs, H., Schneider, G., 2015. A stochastic model for EEG microstate sequence  
690 analysis. *Neuroimage* 104, 199–208.

- 691 Giacino, J.T., Fins, J.J., Laureys, S., Schiff, N.D., 2014. Disorders of consciousness after acquired brain injury: the  
692 state of the science. *Nat. Rev. Neurol.* 10, 99–114.
- 693 Gibbons, J.D., Chakraborti, S., 2011. *Nonparametric statistical inference*. Springer.
- 694 Goupil, L., Bekinschtein, T. a., 2012. Cognitive processing during the transition to sleep. *Arch. Ital. Biol.* 150,  
695 140–154.
- 696 Greenhouse, S.W., Geisser, S., 1959. On methods in the analysis of profile data. *Psychometrika* 24, 95–112.
- 697 Grieder, M., Koenig, T., Kinoshita, T., Utsunomiya, K., Wahlund, L.O., Dierks, T., Nishida, K., 2016. Discovering  
698 EEG resting state alterations of semantic dementia. *Clin. Neurophysiol.* 127, 2175–2181.
- 699 Hobson, J.A., Pace-Schott, E.F., 2002. The cognitive neuroscience of sleep: neuronal systems, consciousness  
700 and learning. *Nat. Rev. Neurosci.* 3, 679–93.
- 701 Hogg, R. V., Ledolter, J., 1987. *Engineering Statistics*. MacMillan, New York.
- 702 Hori, T., Hayashi, M., Morikawa, T., 1994. Topographical EEG changes and the hypnagogic experience., in:  
703 Sleep Onset: Normal and Abnormal Processes. American Psychological Association, Washington, pp.  
704 237–253.
- 705 Iber, C., Ancoli-Israel, S., Chesson Jr., A.L., Quan, S.F., 2007. *The AASM Manual for the Scoring of Sleep and*  
706 *Associated Events: Rules Terminology and Technical Specifications* 1st ed.
- 707 Katayama, H., Gianotti, L.R.R., Isotani, T., Faber, P.L., Sasada, K., Kinoshita, T., Lehmann, D., 2007. Classes of  
708 multichannel EEG microstates in light and deep hypnotic conditions. *Brain Topogr.* 20, 7–14.
- 709 Khanna, A., Pascual-Leone, A., Farzan, F., 2014. Reliability of Resting-State Microstate Features in  
710 Electroencephalography. *PLoS One* 9, e114163.
- 711 Kikuchi, M., Koenig, T., Munesue, T., Hanaoka, A., Strik, W., Dierks, T., Koshino, Y., Minabe, Y., 2011. EEG  
712 microstate analysis in Drug-Naive patients with panic disorder. *PLoS One* 6, 2–7.
- 713 Kikuchi, M., Koenig, T., Wada, Y., Higashima, M., Koshino, Y., Strik, W., Dierks, T., 2007. Native EEG and  
714 treatment effects in neuroleptic-naïve schizophrenic patients: Time and frequency domain approaches.  
715 *Schizophr. Res.* 97, 163–172.
- 716 Kindler, J., Hubl, D., Strik, W.K., Dierks, T., Koenig, T., 2011. Resting-state EEG in schizophrenia: Auditory verbal  
717 hallucinations are related to shortening of specific microstates. *Clin. Neurophysiol.* 122, 1179–1182.
- 718 Koch, C., Massimini, M., Boly, M., Tononi, G., 2016. Neural correlates of consciousness: progress and problems.  
719 *Nat. Rev. Neurosci.* 17, 307–321.
- 720 Koenig, T., Brandeis, D., 2016. Inappropriate assumptions about EEG state changes and their impact on the

- 721 quantification of EEG state dynamics. *Neuroimage* 125, 1104–1106.
- 722 Koenig, T., Lehmann, D., Merlo, M.C.G., Kochi, K., Hell, D., Koukkou, M., 1999. A deviant EEG brain microstate  
723 in acute, neuroleptic-naïve schizophrenics at rest. *Eur. Arch. Psychiatry Clin. Neurosci.* 249, 205–211.
- 724 Koenig, T., Prichep, L., Lehmann, D., Sosa, P.V., Braeker, E., Kleinlogel, H., Isenhardt, R., John, E.R., 2002.  
725 Millisecond by millisecond, year by year: normative EEG microstates and developmental stages.  
726 *Neuroimage* 16, 41–48.
- 727 Koenig, T., Studer, D., Hubl, D., Melie, L., Strik, W.K., 2005. Brain connectivity at different time-scales measured  
728 with EEG. *Philos. Trans. R. Soc. B Biol. Sci.* 360, 1015–1024.
- 729 Kouider, S., Andrillon, T., Barbosa, L.S., Goupil, L., Bekinschtein, T.A., 2014. Inducing Task-Relevant Responses  
730 to Speech in the Sleeping Brain. *Curr. Biol.* 24, 2208–2214.
- 731 Kuhn, A., Brodbeck, V., Tagliazucchi, E., Morzelewski, A., von Wegner, F., Laufs, H., 2015. Narcoleptic Patients  
732 Show Fragmented EEG-Microstructure During Early NREM Sleep. *Brain Topogr.* 28, 619–635.
- 733 Laureys, S., 2005. The neural correlate of (un)awareness: lessons from the vegetative state. *Trends Cogn. Sci.*  
734 9, 556–559.
- 735 Lechinger, J., Bothe, K., Pichler, G., Michitsch, G., Donis, J., Klimesch, W., Schabus, M., 2013. CRS-R score in  
736 disorders of consciousness is strongly related to spectral EEG at rest. *J. Neurol.* 260, 2348–2356.
- 737 Lee, H., Mashour, G. a, Noh, G.-J., Kim, S., Lee, U., 2013. Reconfiguration of network hub structure after  
738 propofol-induced unconsciousness. *Anesthesiology* 119, 1347–59.
- 739 Lehmann, D., 1990. Brain electric microstates and cognition: the atoms of thought, in: *Machinery of the Mind*.  
740 Springer, pp. 209–224.
- 741 Lehmann, D., 1971. Multichannel topography of human alpha EEG fields. *Electroencephalogr. Clin.*  
742 *Neurophysiol.* 31, 439–449.
- 743 Lehmann, D., Faber, P.L., Galderisi, S., Herrmann, W.M., Kinoshita, T., Koukkou, M., Mucci, A., Pascual-Marqui,  
744 R.D., Saito, N., Wackermann, J., Winterer, G., Koenig, T., 2005. EEG microstate duration and syntax in  
745 acute, medication-naïve, first-episode schizophrenia: A multi-center study. *Psychiatry Res.* -  
746 *Neuroimaging* 138, 141–156.
- 747 Lehmann, D., Ozaki, H., Pal, I., 1987. EEG alpha map series: brain micro-states by space-oriented adaptive  
748 segmentation. *Electroencephalogr. Clin. Neurophysiol.* 67, 271–288.
- 749 Lehmann, D., Pascual-Marqui, R.D., Strik, W.K., Koenig, T., 2010. Core networks for visual-concrete and  
750 abstract thought content: A brain electric microstate analysis. *Neuroimage* 49, 1073–1079.
- 751 Lehmann, D., Skrandies, W., 1980. Reference-free identification of components of checkerboard-evoked

- 752 multichannel potential fields. *Electroencephalogr. Clin. Neurophysiol.* 48, 609–621.
- 753 Marple, L., 1999. Computing the discrete-time “analytic” signal via FFT. *IEEE Trans. Signal Process.* 47, 2600–  
754 2603.
- 755 Mauchly, J.W., 1940. Significance Test for Sphericity of a Normal n-Variate Distribution. *Ann. Math. Stat.* 11,  
756 204–209.
- 757 Michel, C.M., Koenig, T., Brandeis, D., 2009. Electrical neuroimaging in the time domain, in: Michel, C.M.,  
758 Koenig, T., Brandeis, D., Gianotti, L.R.R., Wackermann, J. (Eds.), *Electrical Neuroimaging*. Cambridge  
759 University Press, Cambridge, pp. 111–144.
- 760 Milz, P., Faber, P.L., Lehmann, D., Koenig, T., Kochi, K., Pascual-Marqui, R.D., 2015. The functional significance  
761 of EEG microstates—Associations with modalities of thinking. *Neuroimage* 125, 643–656.
- 762 Milz, P., Pascual-Marqui, R.D., Achermann, P., Kochi, K., Faber, P.L., 2017. The EEG microstate topography is  
763 predominantly determined by intracortical sources in the alpha band. *Neuroimage* 162, 353–361.
- 764 Morikawa, T., Hayashi, M., Hori, T., 1997. Auto power and coherence analysis of delta-theta band EEG during  
765 the waking-sleeping transition period. *Electroencephalogr. Clin. Neurophysiol.* 103, 633–641.
- 766 Murray, M.M., Brunet, D., Michel, C.M., 2008. Topographic ERP analyses: A step-by-step tutorial review. *Brain*  
767 *Topogr.* 20, 249–264.
- 768 Niedermeyer, E., 2005a. The Normal EEG of the Waking Adult, in: Niedermeyer, E., Lopes Da Silva, F. (Eds.),  
769 *Electroencephalography: Basic Principles, Clinical Applications, and Related Fields*. Lippincott Williams &  
770 Wilkins, Philadelphia.
- 771 Niedermeyer, E., 2005b. Sleep and EEG, in: *Electroencephalography: Basic Principles, Clinical Applications, and*  
772 *Related Fields*. Lippincott Williams & Wilkins, Philadelphia.
- 773 Nishida, K., Morishima, Y., Yoshimura, M., Isotani, T., Irisawa, S., Jann, K., Dierks, T., Strik, W., Kinoshita, T.,  
774 Koenig, T., 2013. EEG microstates associated with salience and frontoparietal networks in  
775 frontotemporal dementia, schizophrenia and Alzheimer’s disease. *Clin. Neurophysiol.* 124, 1106–1114.
- 776 Ogilvie, R.D., 2001. The process of falling asleep. *Sleep Med. Rev.* 5, 247–270.
- 777 Ogilvie, R.D., Wilkinson, R.T., 1984. The detection of sleep onset: behavioral and physiological convergence.  
778 *Psychophysiology* 21, 510–520.
- 779 Overgaard, M., Overgaard, R., 2011. Measurements of consciousness in the vegetative state. *Lancet* 378,  
780 2052–4.
- 781 Pascual-Marqui, R.D., Lehmann, D., Faber, P., Milz, P., Kochi, K., Yoshimura, M., Nishida, K., Isotani, T.,  
782 Kinoshita, T., 2014. The resting microstate networks (RMN): cortical distributions, dynamics, and

- 783 frequency specific information flow. arXiv Prepr. arXiv1411.1949 1–14.
- 784 Pasqual-Marqui, R.D., Michel, C.M., Lehmann, D., 1995. Segmentation of brain electrical activity into  
785 microstates: model estimation and validation. *IEEE Trans. Biomed. Eng.* 42, 658–665.
- 786 Platt, J.C., 1999. Probabilistic Outputs for Support Vector Machines and Comparisons to Regular Likelihood  
787 Methods. *Adv. Large Margin Classif.*
- 788 Prerau, M.J., Hartnack, K.E., Obregon-Henao, G., Sampson, A., Merlino, M., Gannon, K., Bianchi, M.T.,  
789 Ellenbogen, J.M., Purdon, P.L., 2014. Tracking the Sleep Onset Process: An Empirical Model of Behavioral  
790 and Physiological Dynamics. *PLoS Comput. Biol.* 10, e1003866.
- 791 Purdon, P.L., Pierce, E.T., Mukamel, E. a, Prerau, M.J., Walsh, J.L., Wong, K.F.K., Salazar-Gomez, A.F., Harrell,  
792 P.G., Sampson, A.L., Cimenser, A., Ching, S., Kopell, N.J., Tavares-Stoekel, C., Habeeb, K., Merhar, R.,  
793 Brown, E.N., 2013. Electroencephalogram signatures of loss and recovery of consciousness from  
794 propofol. *Proc. Natl. Acad. Sci. U. S. A.* 110, E1142-51.
- 795 Sanders, R.D., Tononi, G., Laureys, S., Sleigh, J., 2013. Unconsciousness, not equal to unresponsiveness.  
796 *Anesthesiology* 116, 946–959.
- 797 Schlegel, F., Lehmann, D., Faber, P.L., Milz, P., Gianotti, L.R.R., 2012. EEG Microstates During Resting Represent  
798 Personality Differences. *Brain Topogr.* 25, 20–26.
- 799 Seitzman, B.A., Abell, M., Bartley, S.C., Erickson, M.A., Bolbecker, A.R., Hetrick, W.P., 2016. Cognitive  
800 manipulation of brain electric microstates. *Neuroimage* 146, 0–1.
- 801 Steriade, M., McCormick, D., Sejnowski, T., 1993. Thalamocortical oscillations in the sleeping and aroused  
802 brain. *Science (80- )*. 262, 679–685.
- 803 Storey, J.D., 2002. A direct approach approach to false discovery rates. *J. R. Stat. Soc.* 64, 479–498.
- 804 Strelets, V., Faber, P.L., Golikova, J., Novototsky-Vlasov, V., Koenig, T., Gianotti, L.R.R., Gruzelier, J.H., Lehmann,  
805 D., 2003. Chronic schizophrenics with positive symptomatology have shortened EEG microstate  
806 durations. *Clin. Neurophysiol.* 114, 2043–2051.
- 807 Šušmáková, K., Krakovská, a, 2007. Classification of waking, sleep onset and deep sleep by single measures.  
808 *Meas. Sci. Rev.* 7, 34–38.
- 809 Tanaka, H., Hayashi, M., Hori, T., 2000. Topographical characteristics of slow wave activities during the  
810 transition from wakefulness to sleep. *Clin. Neurophysiol.* 111, 417–427.
- 811 Tanaka, H., Hayashi, M., Hori, T., 1998. Topographic mapping of electroencephalography coherence in  
812 hypnagogic state. *Psychiatry Clin. Neurosci.* 52, 147–148.
- 813 Tanaka, H., Hayashi, M., Hori, T., 1997. Topographical characteristics and principal component structure of the



- 814           hypnagogic EEG. *Sleep* 20, 523–534.
- 815   Tomescu, M.I., Rihs, T. a., Becker, R., Britz, J., Custo, A., Grouiller, F., Schneider, M., Debbané, M., Eliez, S.,  
816           Michel, C.M., 2014. Deviant dynamics of EEG resting state pattern in 22q11.2 deletion syndrome  
817           adolescents: A vulnerability marker of schizophrenia? *Schizophr. Res.* 157, 175–181.
- 818   Tukey, J.W., 1949. Comparing individual means in the analysis of variance. *Biometrics* 5, 99–114.
- 819   Van de Ville, D., Britz, J., Michel, C.M., 2010. EEG microstate sequences in healthy humans at rest reveal scale-  
820           free dynamics. *Proc. Natl. Acad. Sci. U. S. A.* 107, 18179–18184.
- 821   Vanhauzenhuysse, A., Demertzi, A., Schabus, M., Noirhomme, Q., Bredart, S., Boly, M., Phillips, C., Soddu, A.,  
822           Luxen, A., Moonen, G., Laureys, S., 2011. Two Distinct Neuronal Networks Mediate the Awareness of  
823           Environment and of Self. *J. Cogn. Neurosci.* 23, 570–578.
- 824   Vert, J., Tsuda, K., Schölkopf, B., 2004. A primer on kernel methods. *Kernel Methods Comput. Biol.* 35–70.
- 825   Vidaurre, D., Quinn, A.J., Baker, A.P., Dupret, D., Tejero-Cantero, A., Woolrich, M.W., 2016. Spectrally resolved  
826           fast transient brain states in electrophysiological data. *Neuroimage* 126, 81–95.
- 827   Vinck, M., Oostenveld, R., van Wingerden, M., Battaglia, F., Pennartz, C.M.A., 2011. An improved index of  
828           phase-synchronization for electrophysiological data in the presence of volume-conduction, noise and  
829           sample-size bias. *Neuroimage* 55, 1548–65.
- 830   Wright, K.P., Badia, P., Wauquier, A., 1995. Topographical and temporal patterns of brain activity during the  
831           transition from wakefulness to sleep. *Sleep* 18, 880–889.
- 832

## 833 Supporting figures

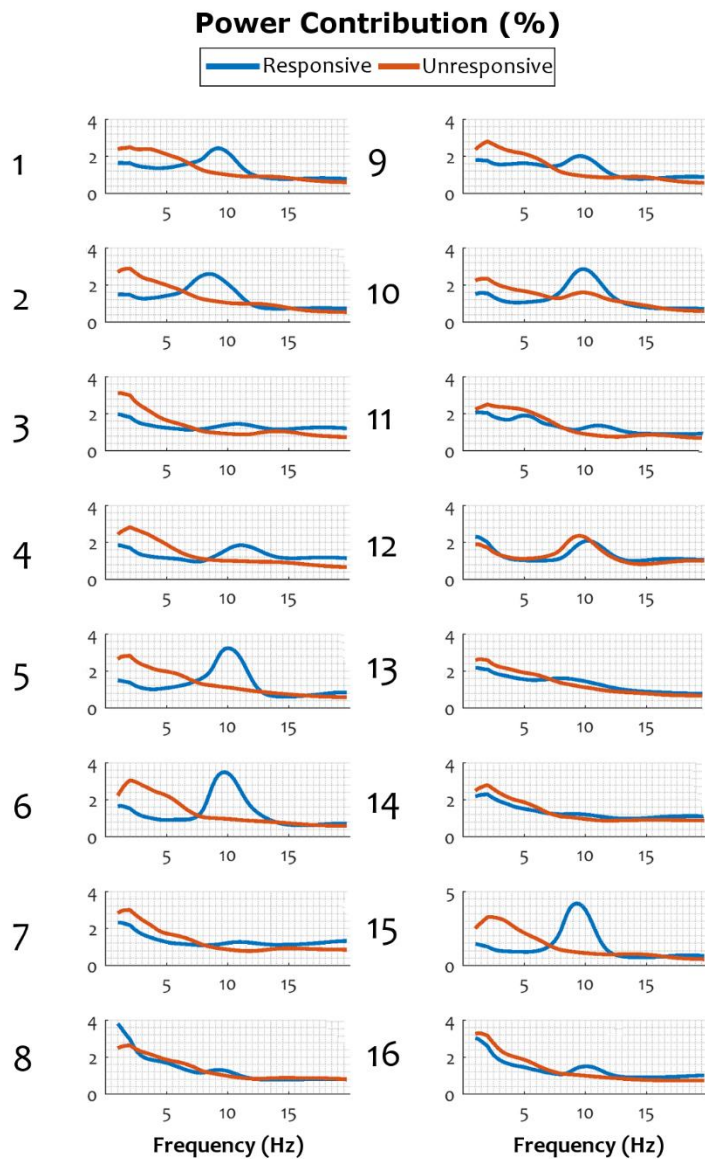

834

835 **Supplementary Figure 1. Individual subject spectral power contributions before and after loss of**

836 **responsiveness.** For each subject, values are averaged over posterior channels (see text).

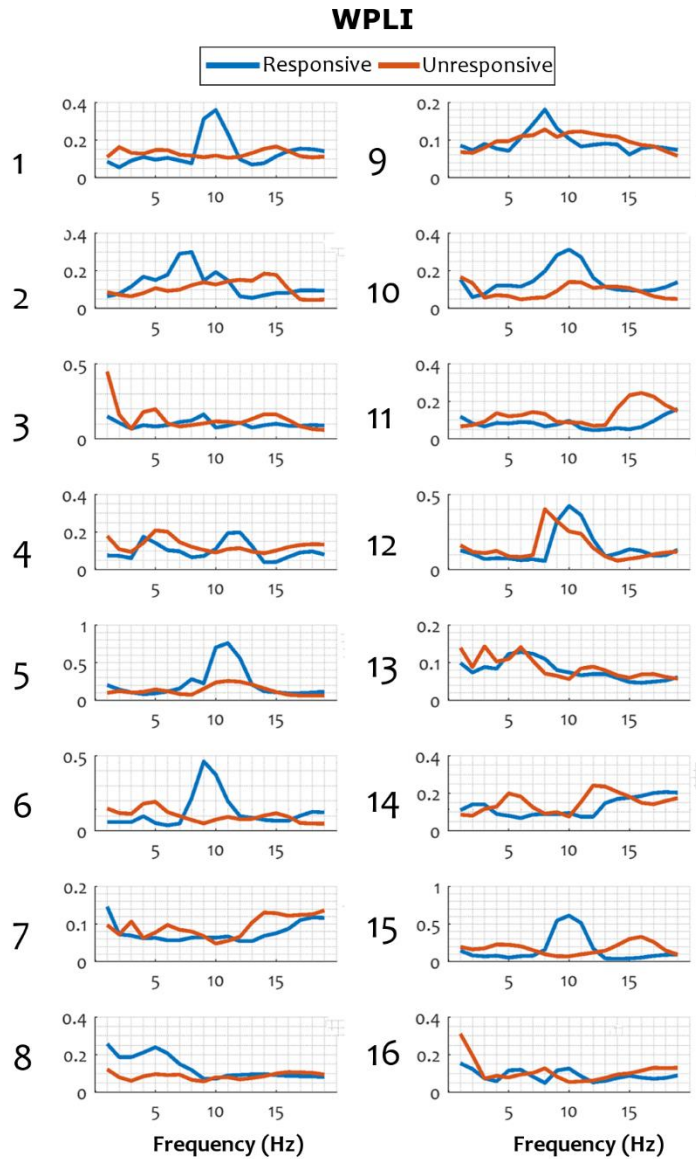

837

838 **Supplementary Figure 2. Median WPLI before and after loss of responsiveness due to drowsiness in**  
839 **individual subjects.**

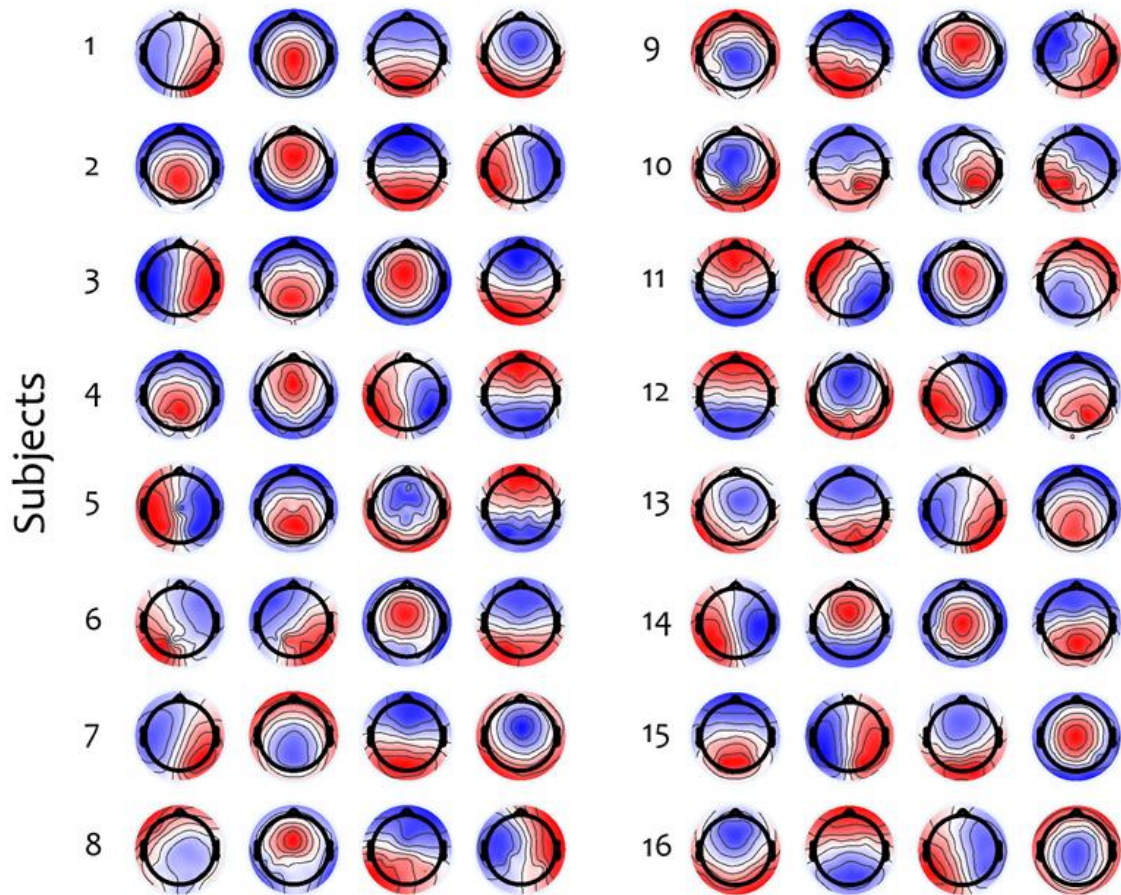

840

841 **Supplementary Figure 3. Microstate topographies in each subject, computed over the responsive and**  
842 **unresponsive periods.**

843
